# Supplementary figures and images for: Modelling the effects of climate and land cover change on groundwater recharge in south-west Western Australia
Source: Copernicus journal article supplement (doi:10.5194/hess-16-2709-2012), 2012-08-14

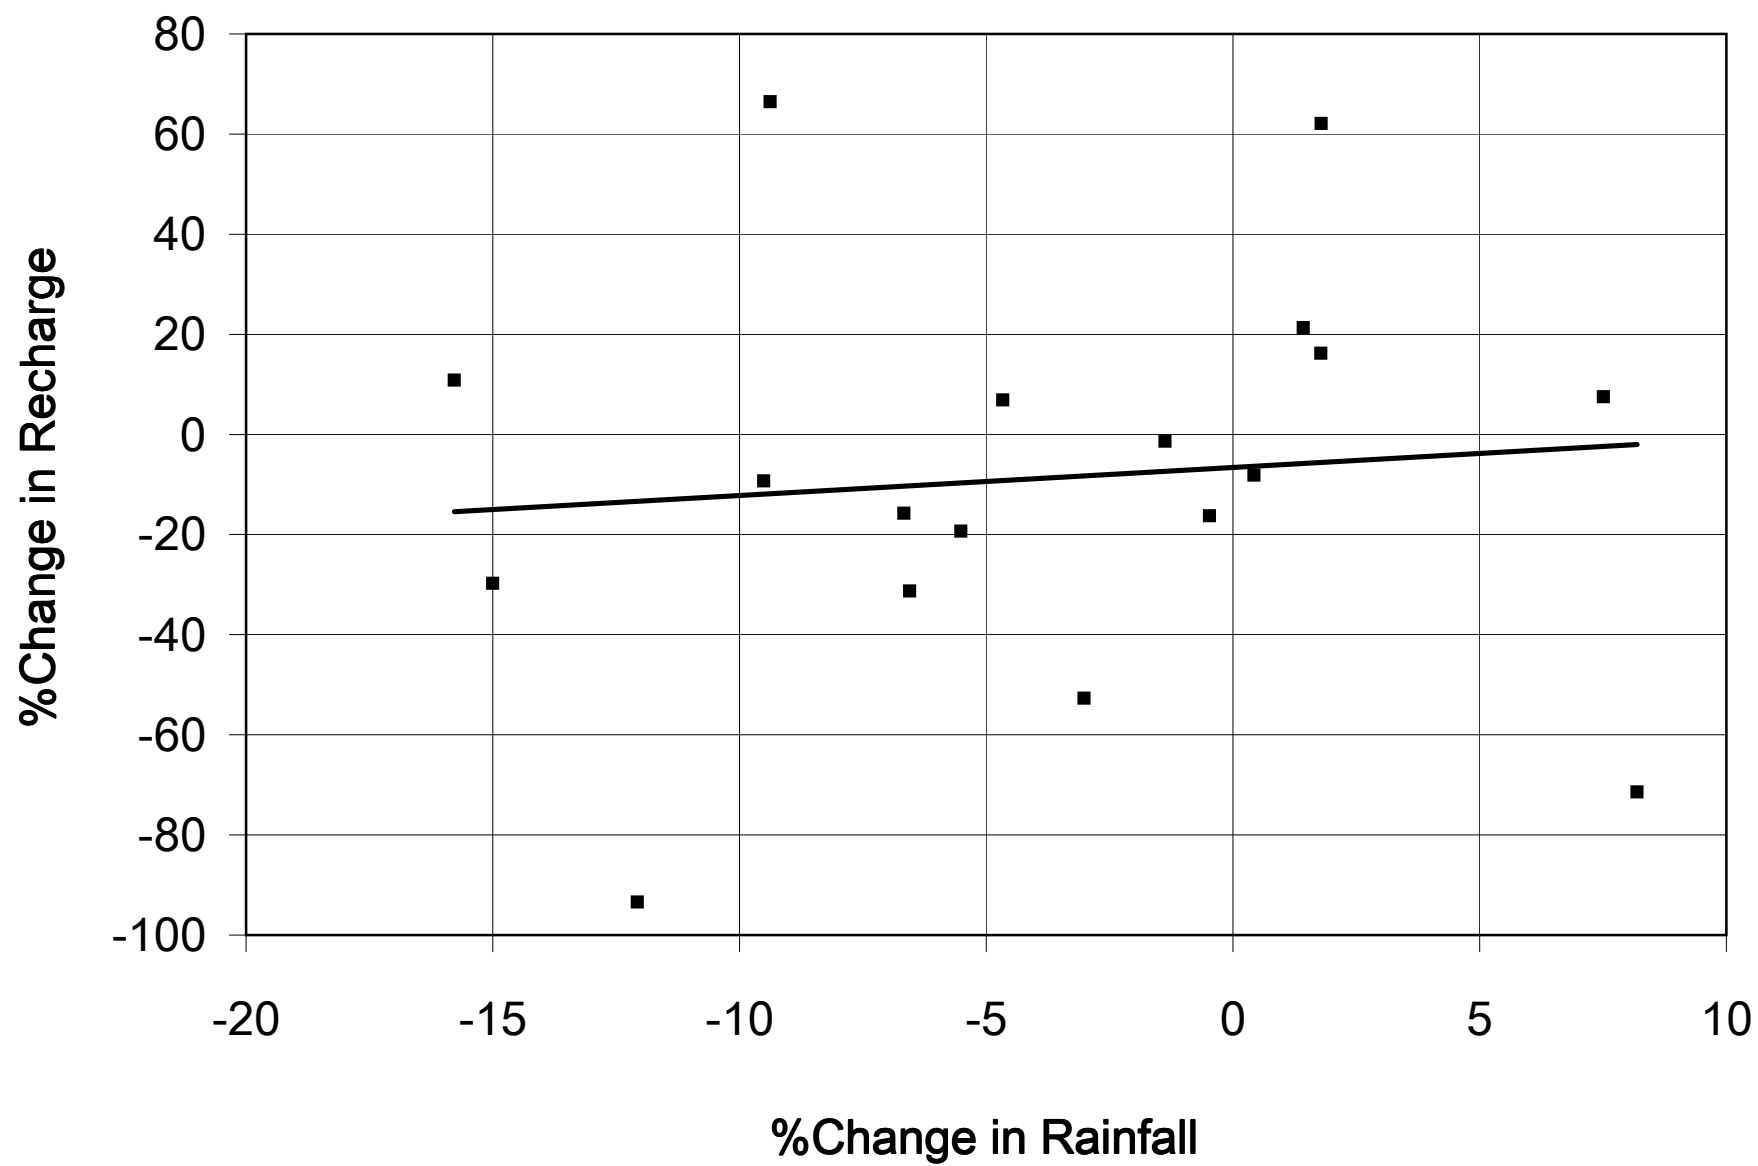

Supplement: Supplementary file 2 [file hess-16-2709-2012-supplement.zip]

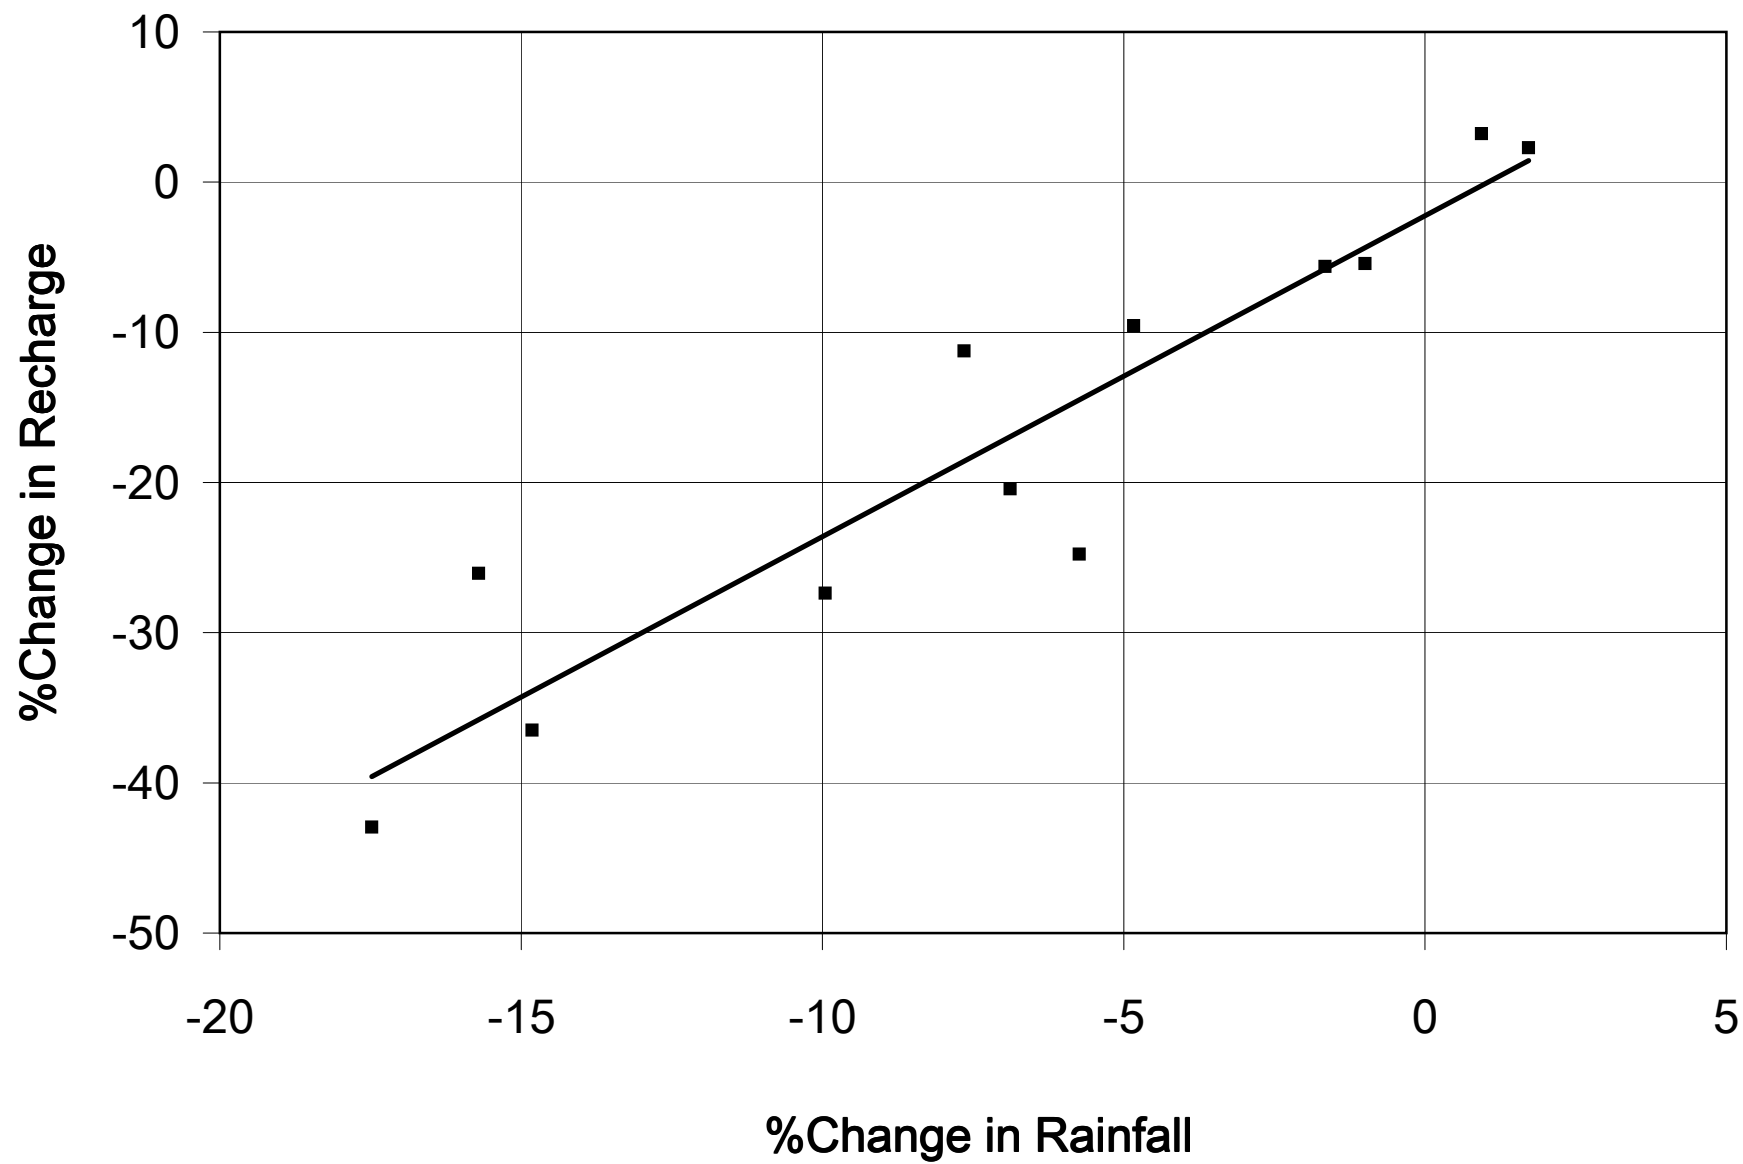

Supplement: Supplementary file 3 [file hess-16-2709-2012-supplement.zip]

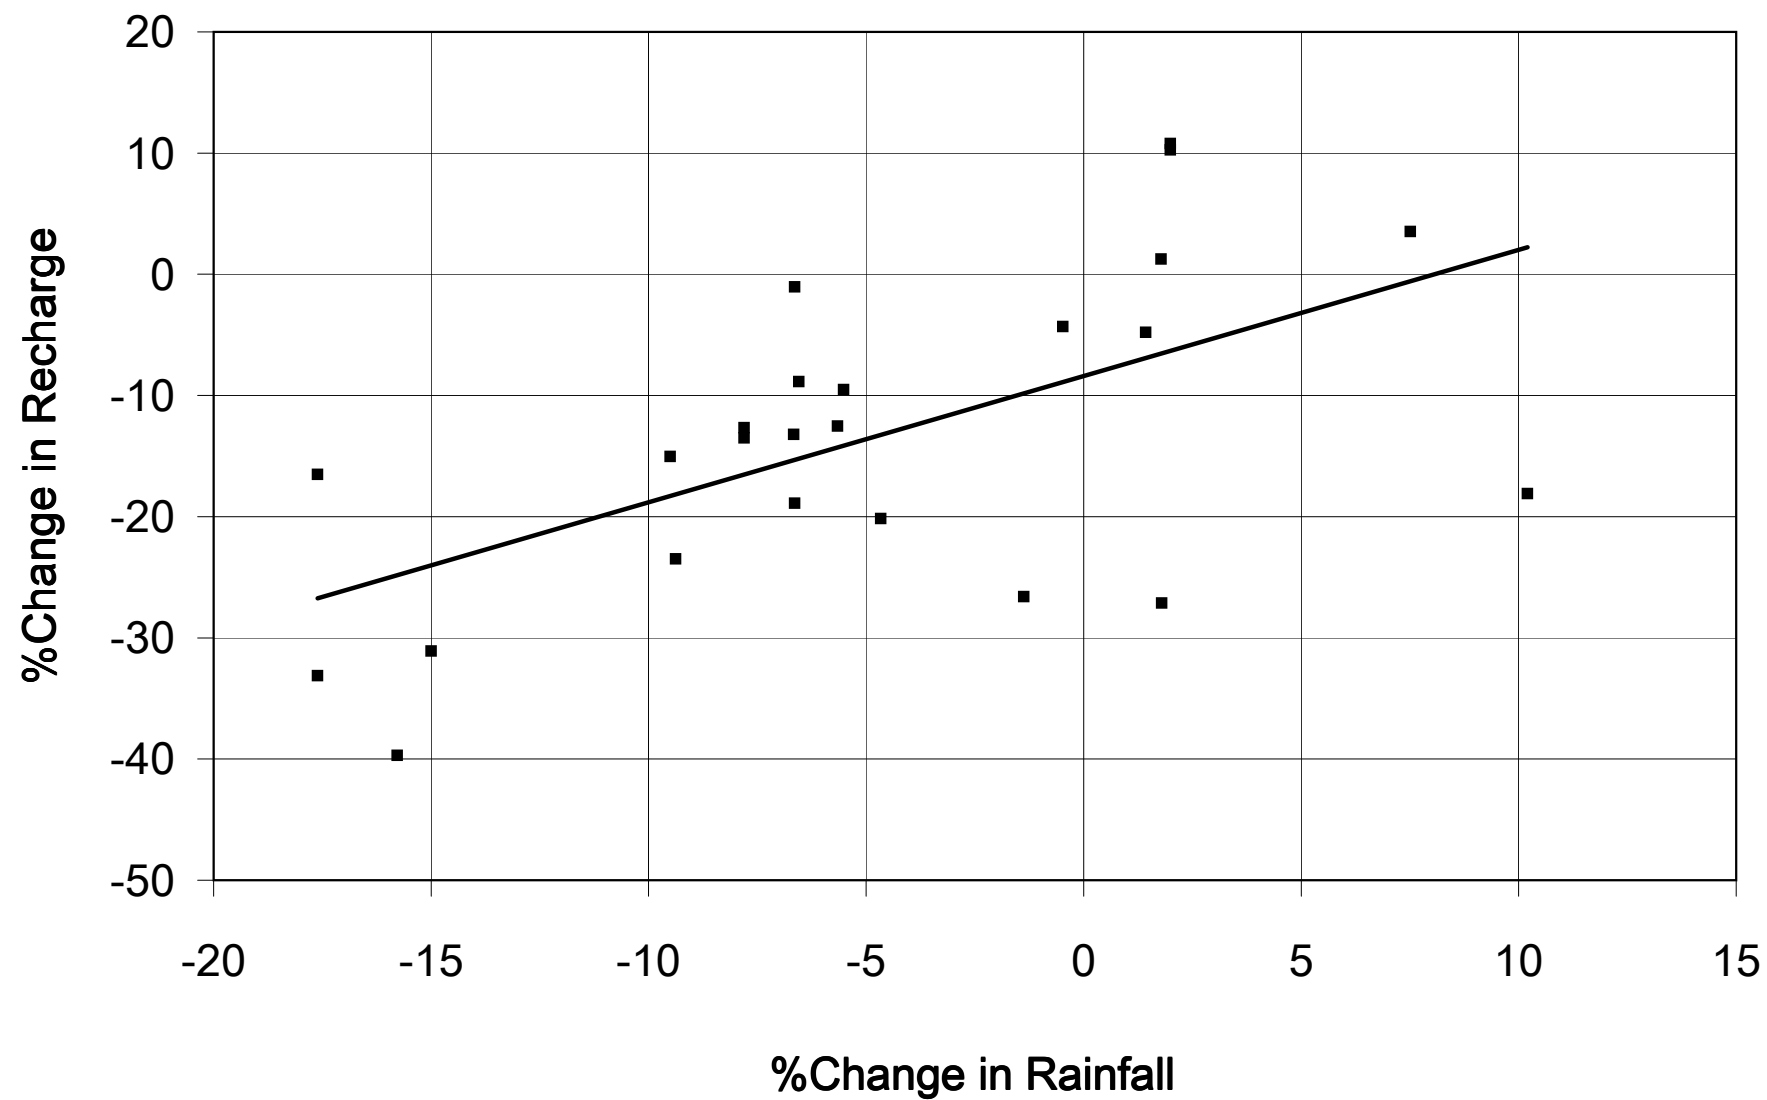

Supplement: Supplementary file 4 [file hess-16-2709-2012-supplement.zip]

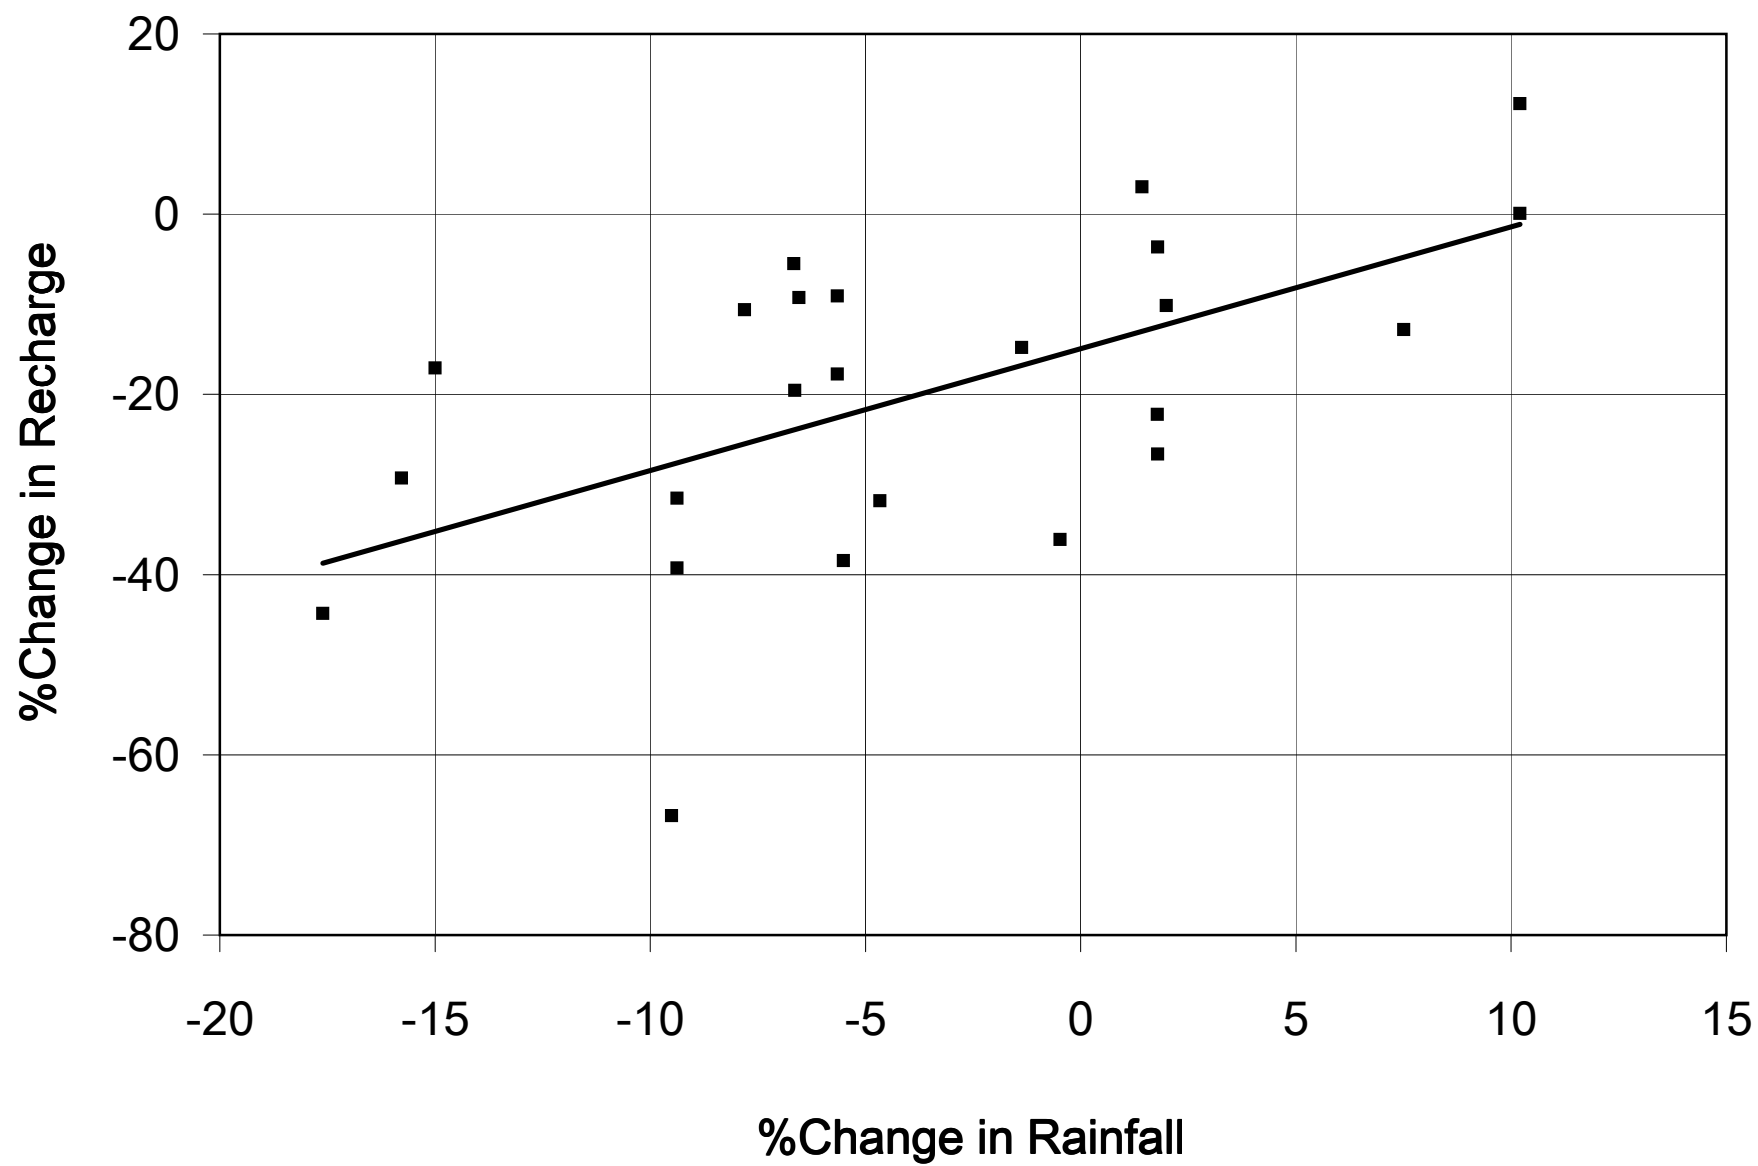

Supplement: Supplementary file 5 [file hess-16-2709-2012-supplement.zip]

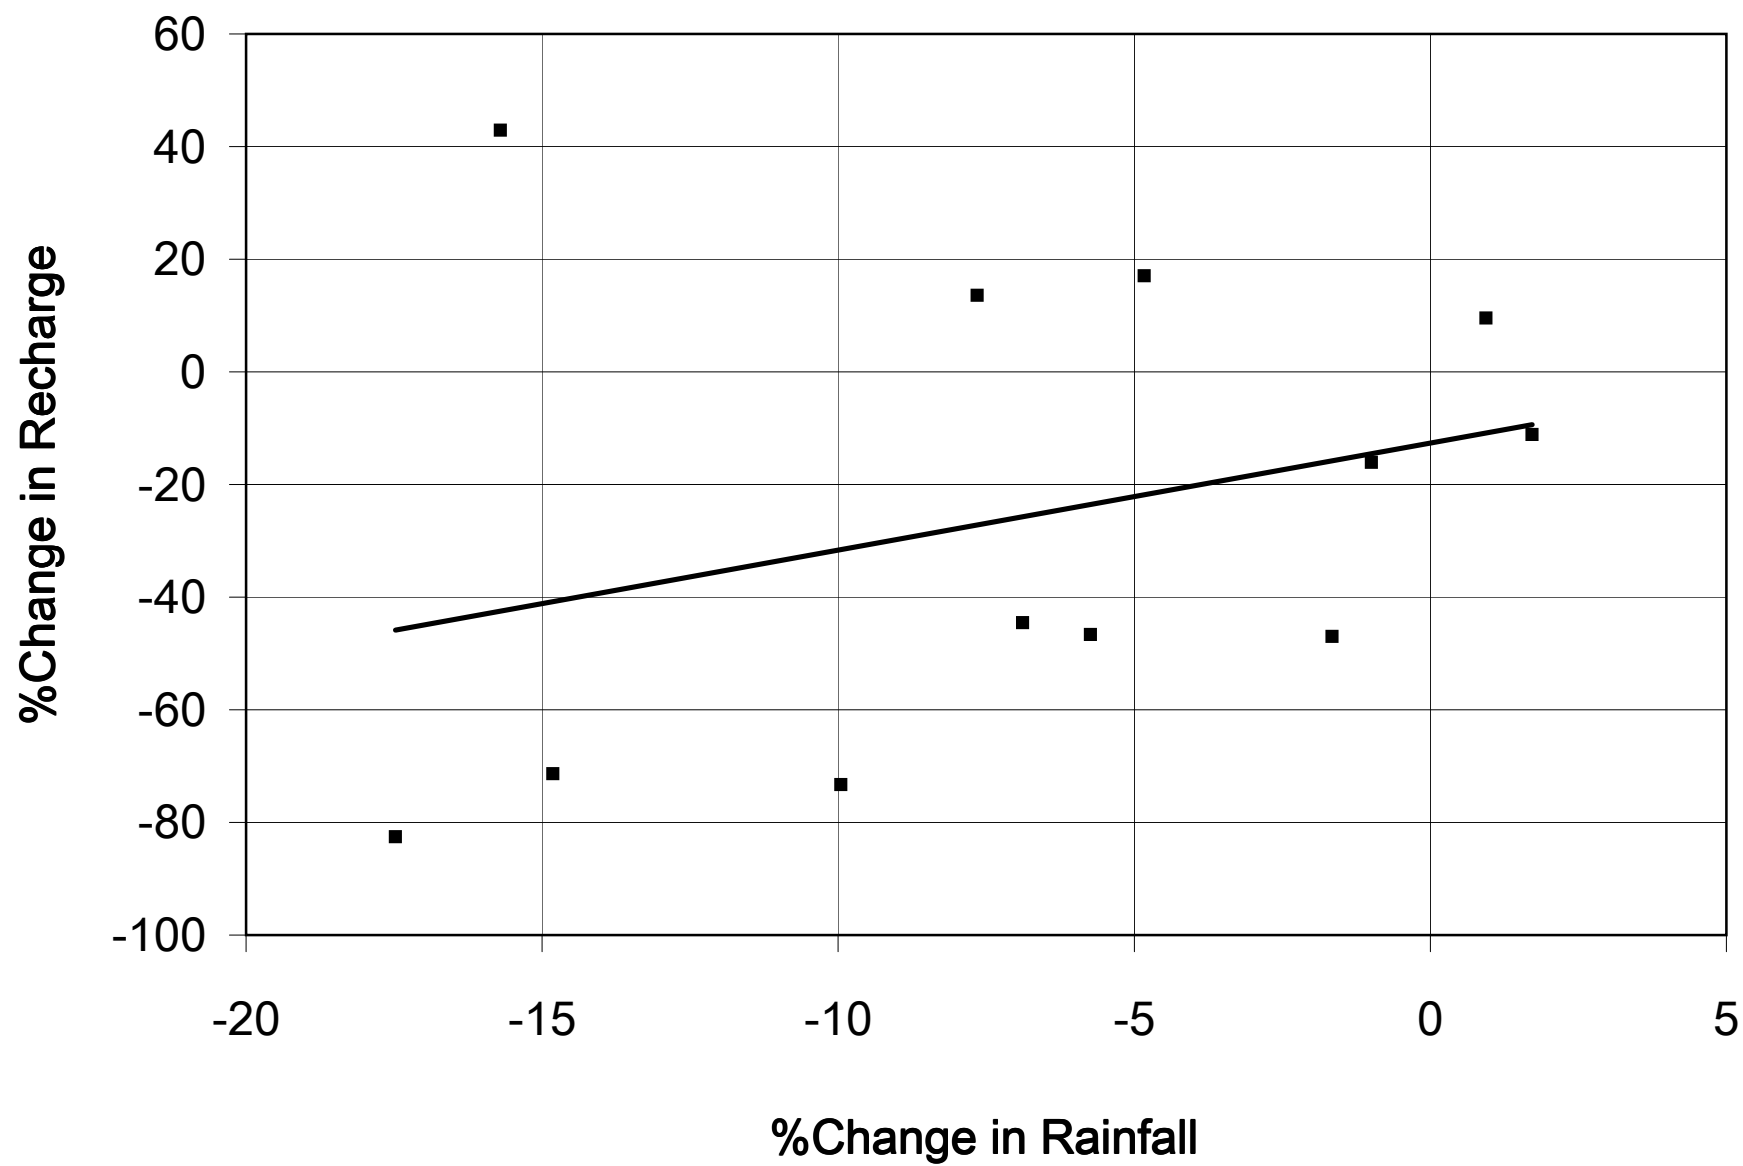

Supplement: Supplementary file 6 [file hess-16-2709-2012-supplement.zip]

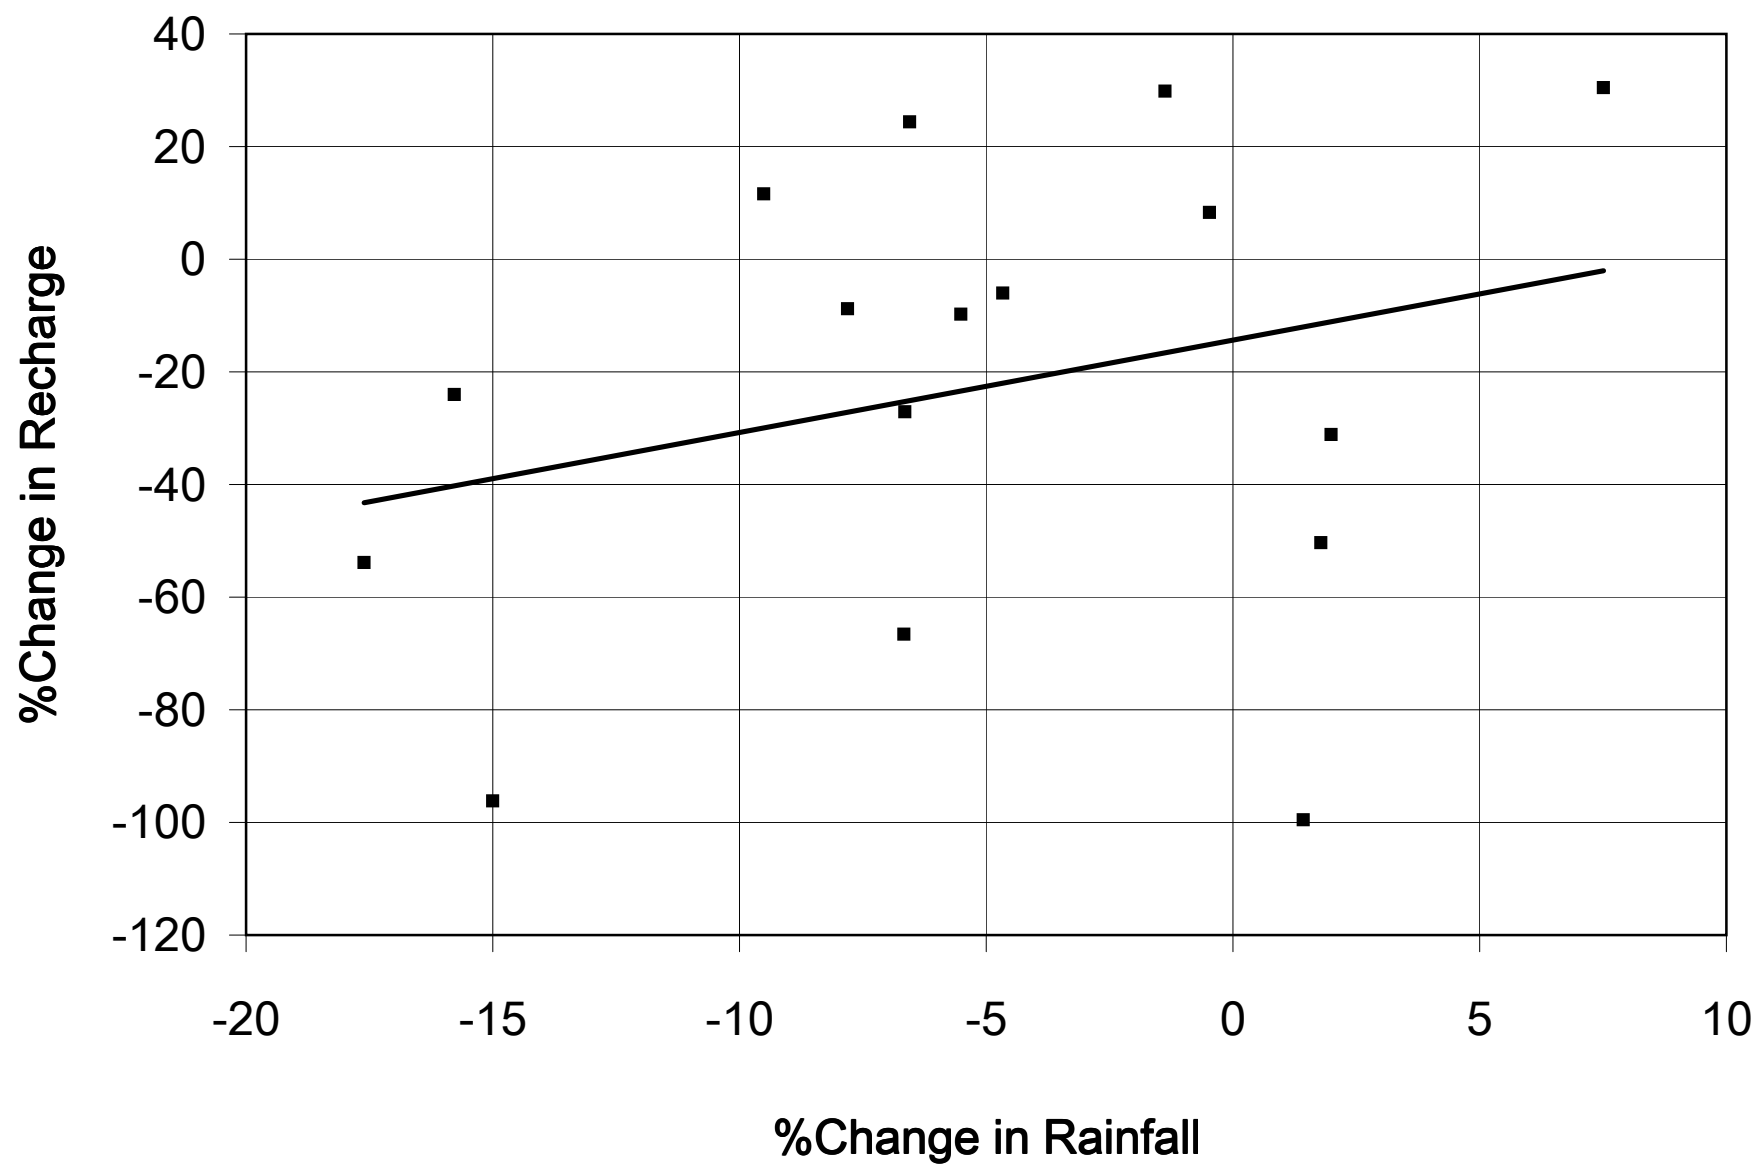

Supplement: Supplementary file 7 [file hess-16-2709-2012-supplement.zip]

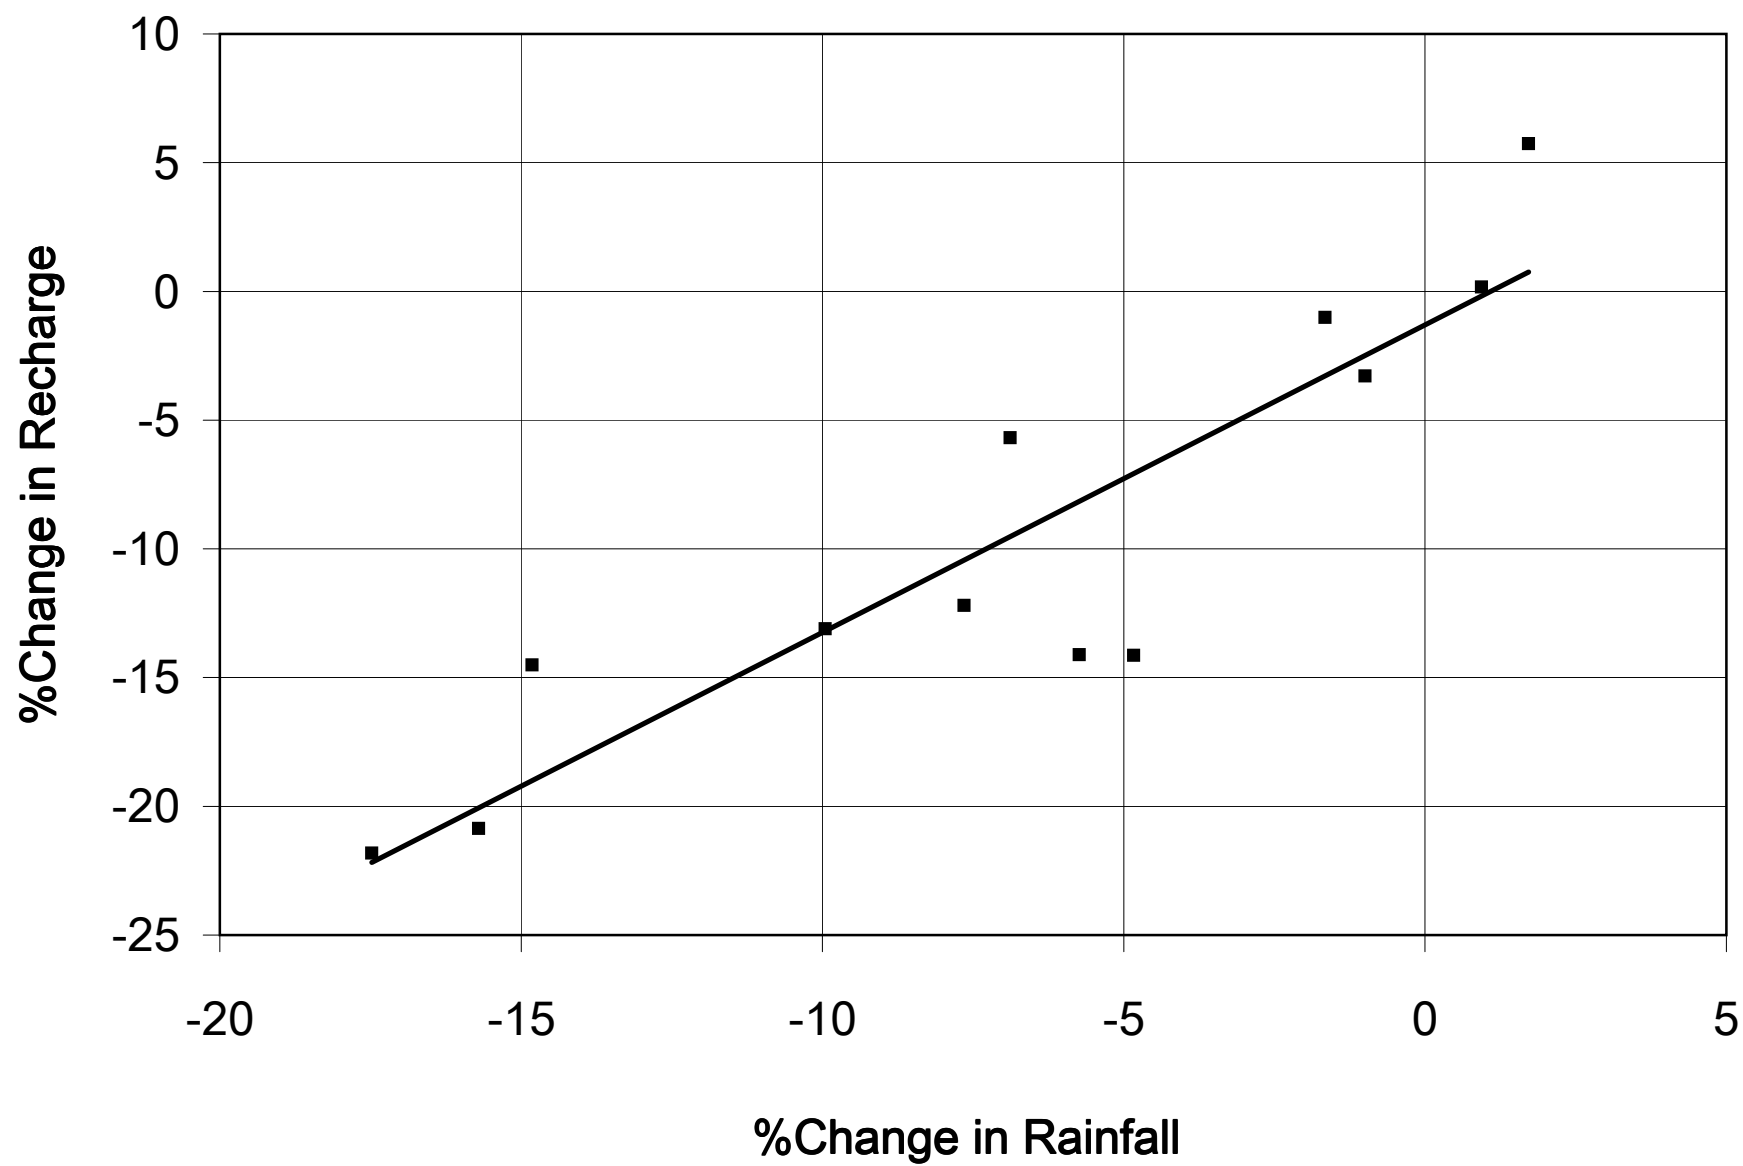

Supplement: Supplementary file 8 [file hess-16-2709-2012-supplement.zip]

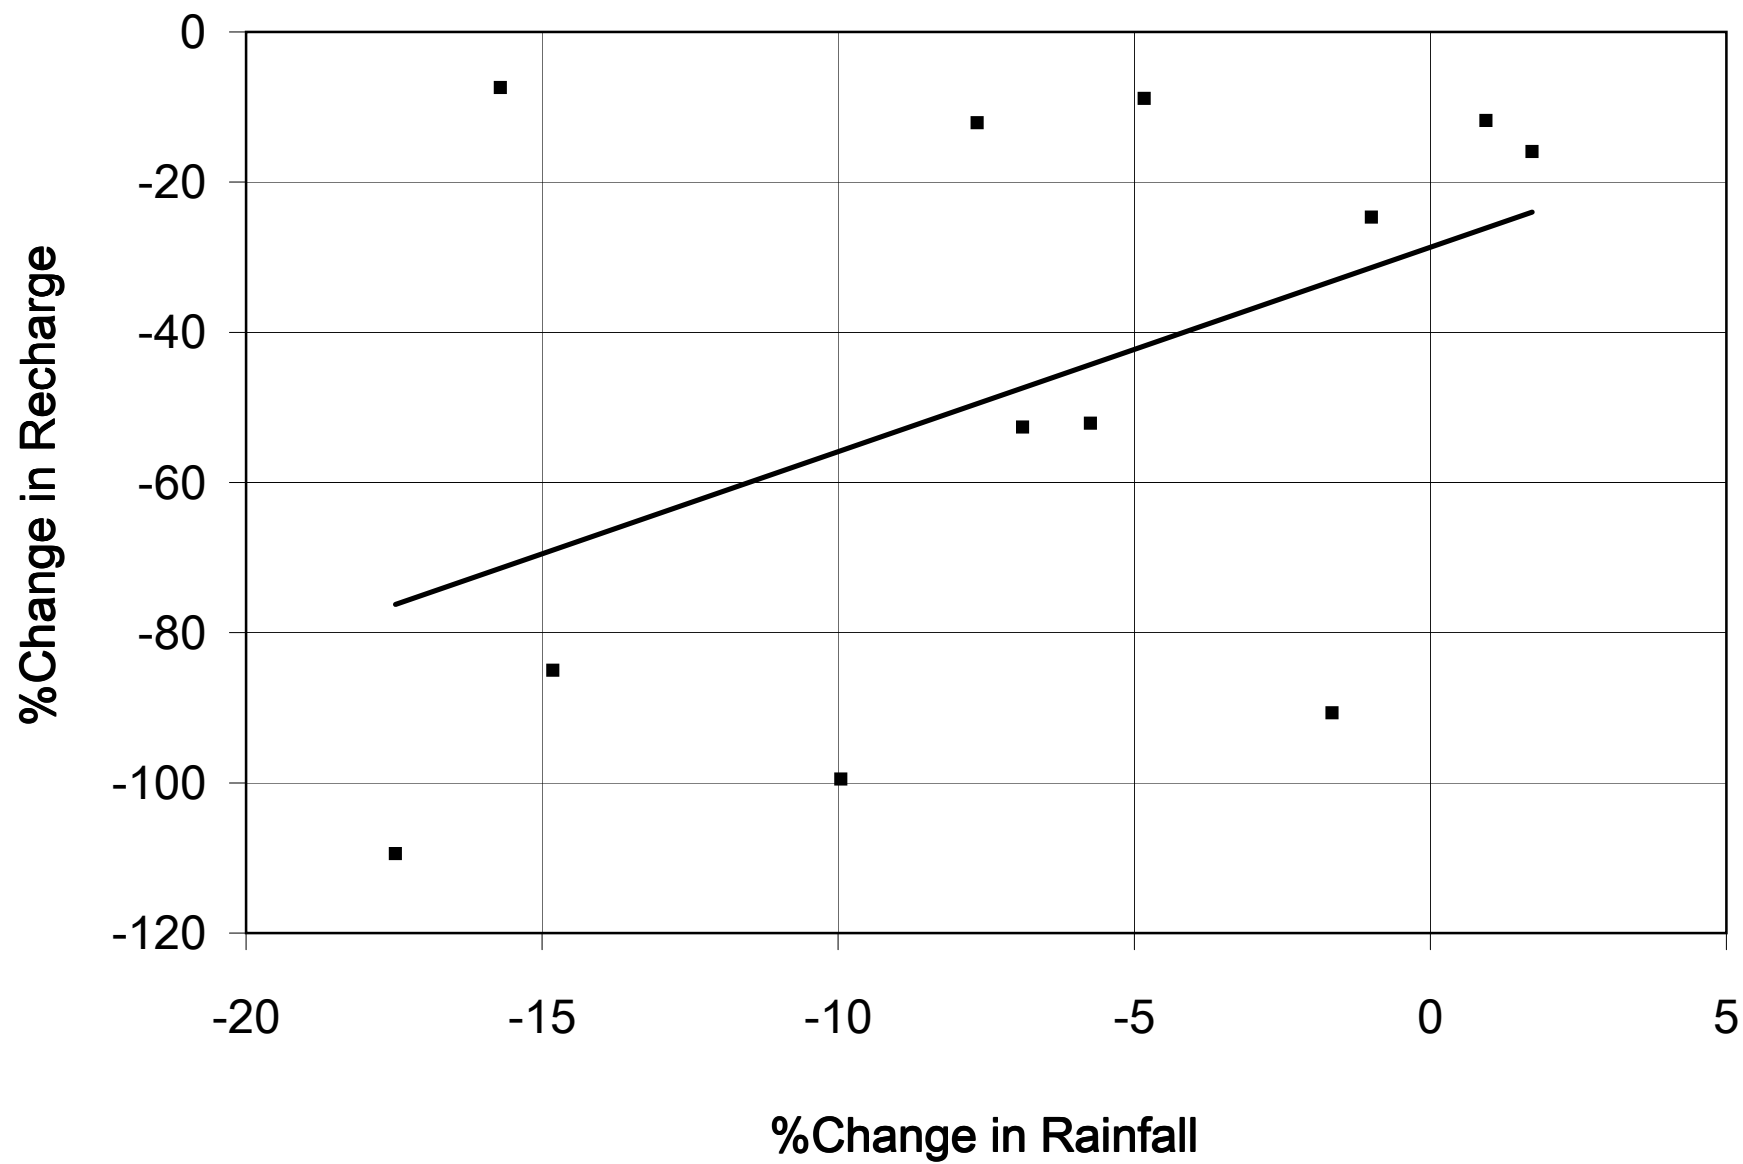

Supplement: Supplementary file 9 [file hess-16-2709-2012-supplement.zip]
